# Supplementary material for: Population structure and genetic diversity characterization of a sunflower association mapping population using SSR and SNP markers
Source: PubMed Central journal article supplement (PMC4351844; doi:10.1186/s12870-014-0360-x), 2015-02-13

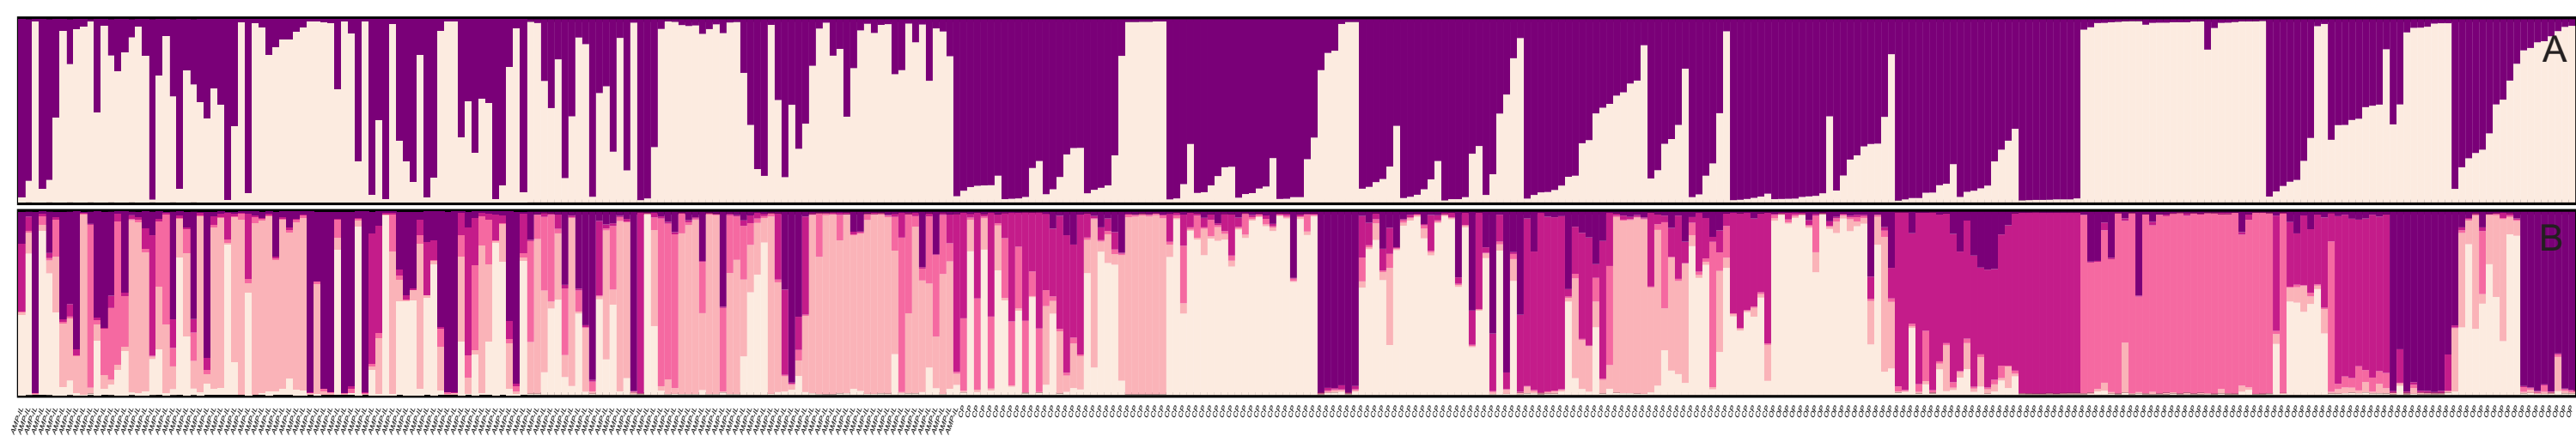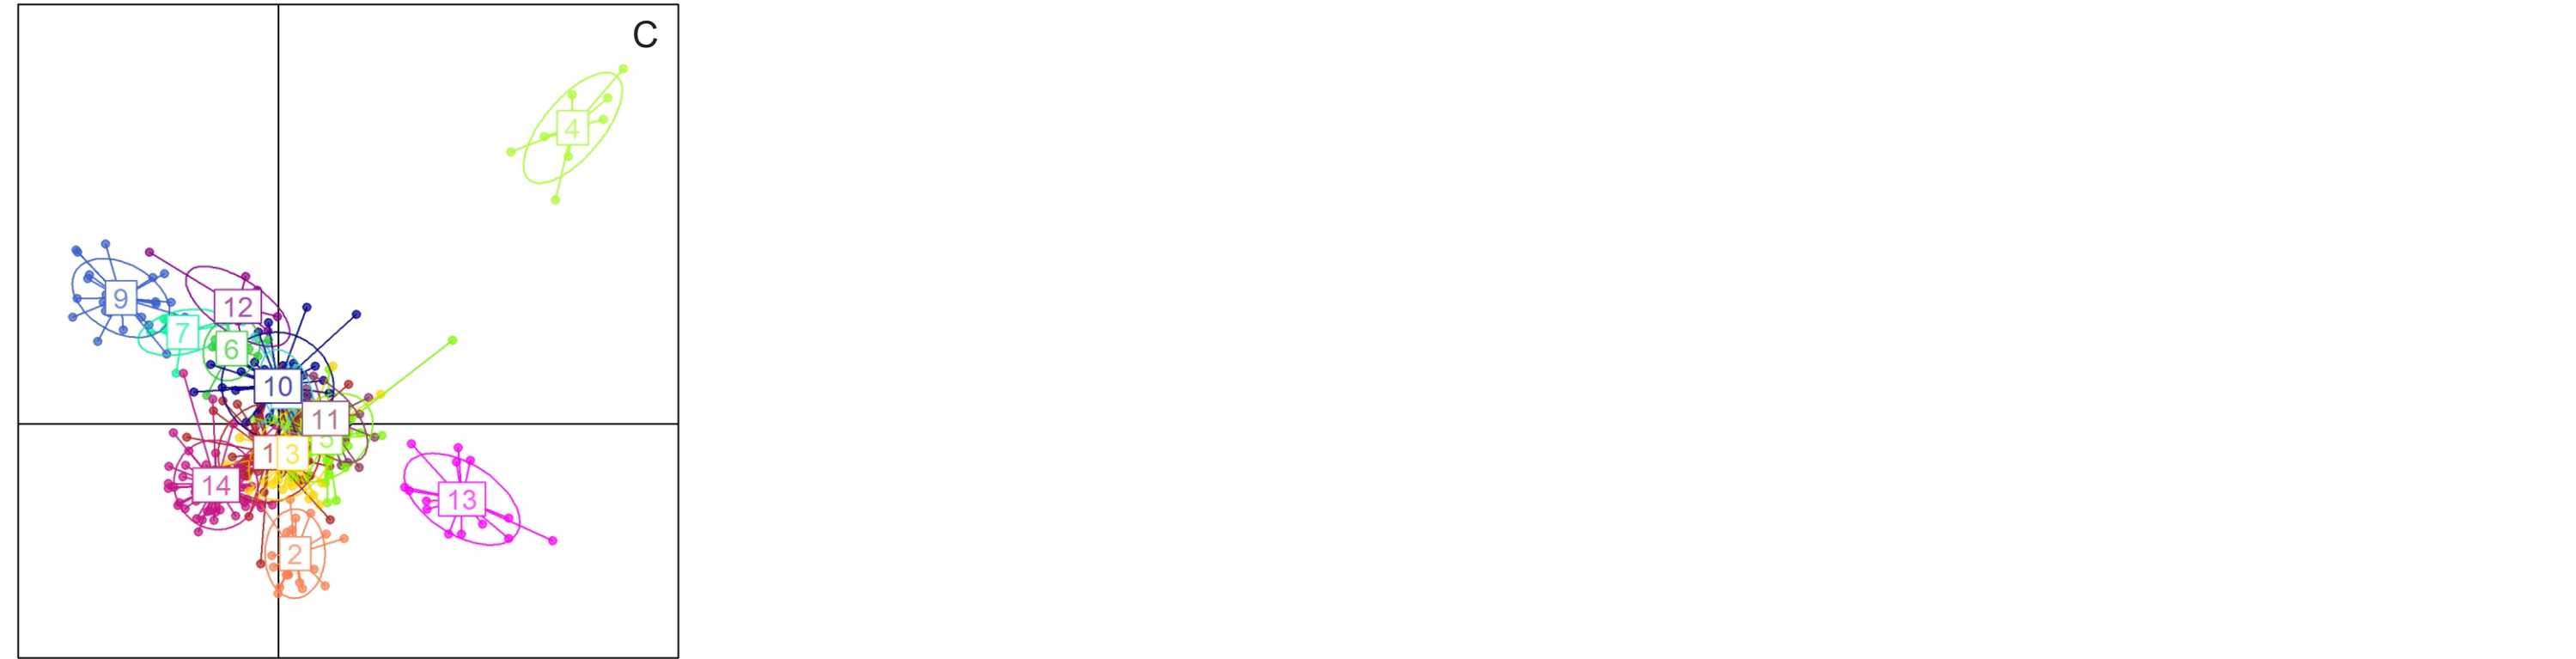

Supplement: 12870_2014_360_MOESM2_ESM.pdf [file 12870_2014_360_MOESM2_ESM.pdf]
